# Supplementary material for: Solid Phase Nitrosylation of Enantiomeric Cobalt(II) Complexes
Source: MDPI journal article supplement (doi:10.3390/chemistry3020041), 2021-04-28
Supplement: s1 [file s1]

## SUPPLEMENTARY INFORMATION

### Solid Phase Nitrosylation of Enantiomeric Cobalt(II) Complexes

*Mads Sondrup Møller, Morten Czochara Liljedahl, Vickie McKee and Christine J. McKenzie*

| Index                                                                                                                               | page |
|-------------------------------------------------------------------------------------------------------------------------------------|------|
| <b>Figure S1.</b> SCXRD of $\text{Co}(\text{L}^{R,R})$                                                                              | 2    |
| <b>Figure S2.</b> Co–O and Co–N bond distances in Co complexes of $\text{L}^{2-}$ .                                                 | 3    |
| <b>Figure S3.</b> Packing diagram for $\text{Co}(\text{L}^{R,R})\cdot\text{CS}_2$                                                   | 3    |
| <b>Figure S4.</b> Packing diagram for $\text{Co}(\text{NO})(\text{L}^{R,R})\cdot\text{CS}_2$                                        | 4    |
| <b>Figure S5.</b> Observed and calculated IR and VCD spectra of $\text{L}^{R,R}$ and $\text{Zn}(\text{L}^{R,R})$                    | 4    |
| <b>Figure S6.</b> Cumulative intensity distribution plot and Wilson plot for $\text{Co}(\text{L}^{R,R})\cdot\text{CS}_2$            | 5    |
| <b>Figure S7.</b> Cumulative intensity distribution plot and Wilson plot for $\text{Co}(\text{L}^{R,R})$                            | 5    |
| <b>Figure S8.</b> Cumulative intensity distribution plot and Wilson plot for $\text{Co}(\text{NO})(\text{L}^{R,R})\cdot\text{CS}_2$ | 5    |
| <b>Figure S9.</b> UV-vis spectra of $\text{Co}(\text{L}^{R,R})$ and $\text{Co}(\text{NO})(\text{L}^{R,R})$                          | 6    |

Accompanying film (SI film.mp4) shows the sorption of NO into  $\text{Co}(\text{L}^{R,R})$  to give  $\text{Co}(\text{NO})(\text{L}^{R,R})$ .

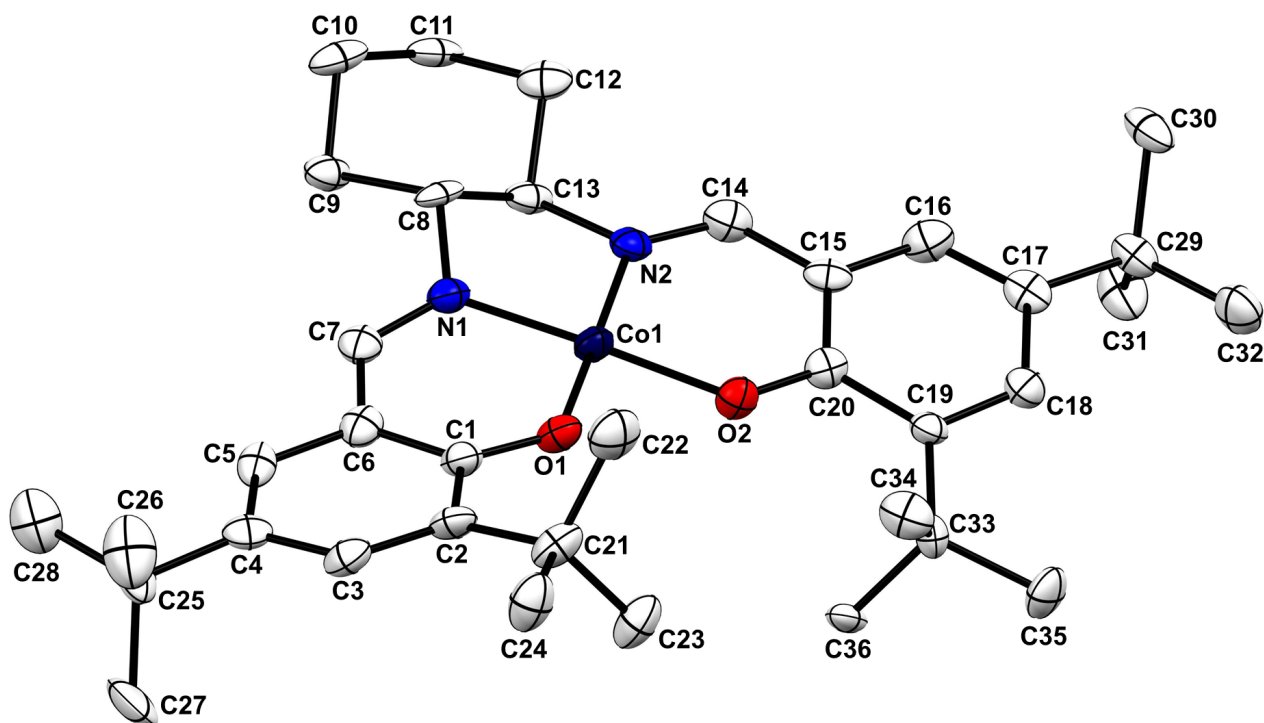

**Figure S1.** Single crystal X-ray structure of one of  $\text{Co}(\text{L}^{\text{R,R}})$ . Atomic displacement ellipsoids are drawn at 50 % probability and hydrogen atoms are omitted for clarity.

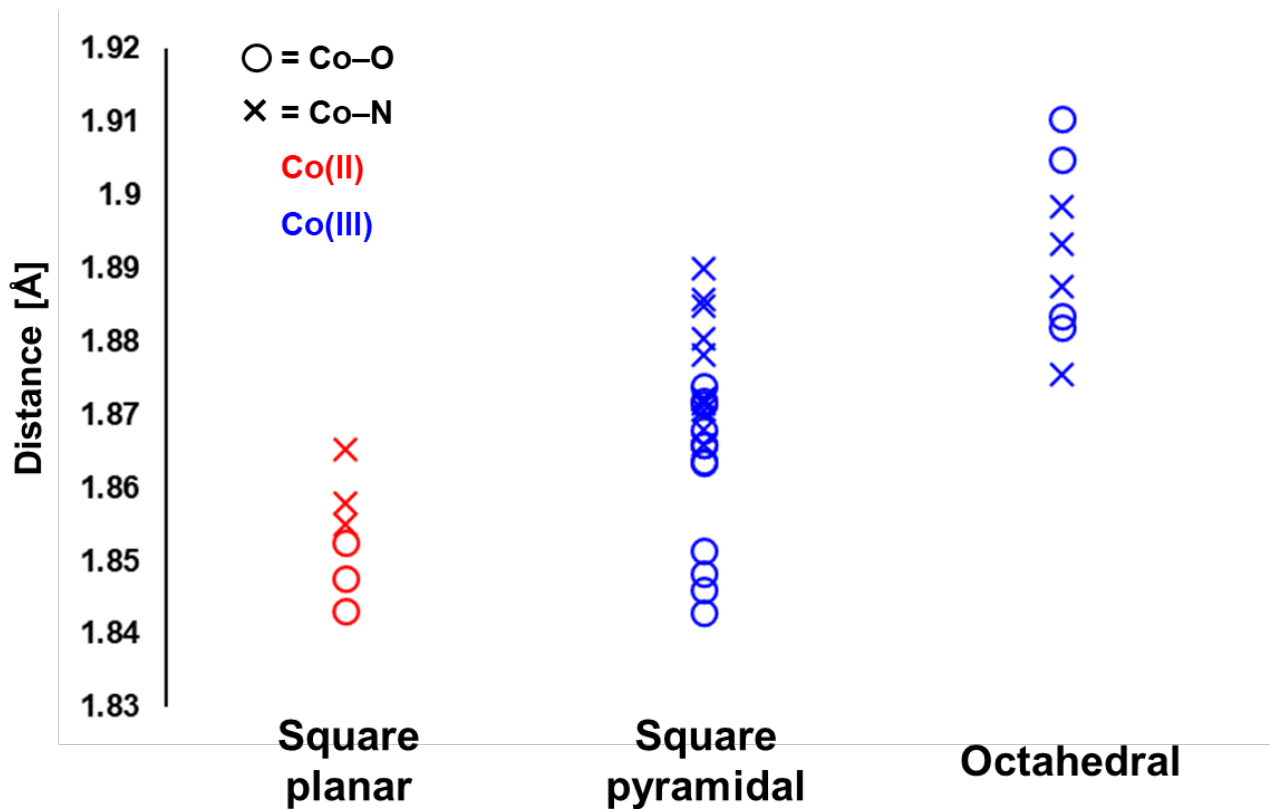

**Figure S2.** Diagram showing the relationship between Co–O and Co–N bond distances, coordination geometry and oxidation state for all the Co(L), Co(X)(L) and Co(X)<sub>2</sub>(L) complexes currently available in the CCDC [1–14].

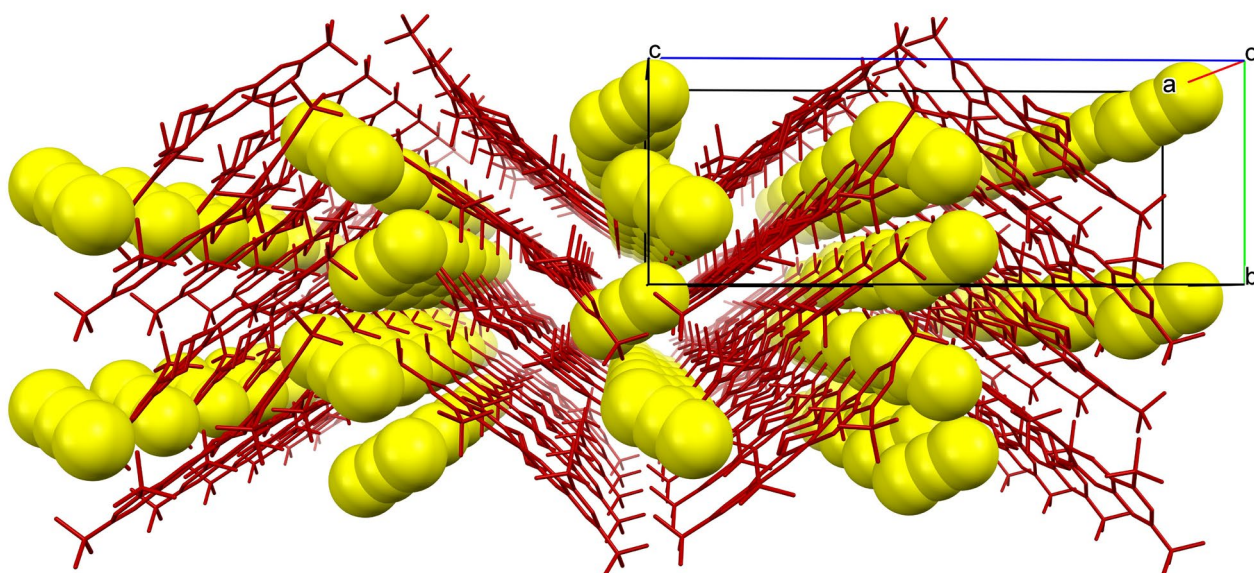

**Figure S3.** Packing diagram for Co(L<sup>R,R</sup>)•CS<sub>2</sub>, with CS<sub>2</sub> in yellow. Hydrogen atoms are omitted for clarity.

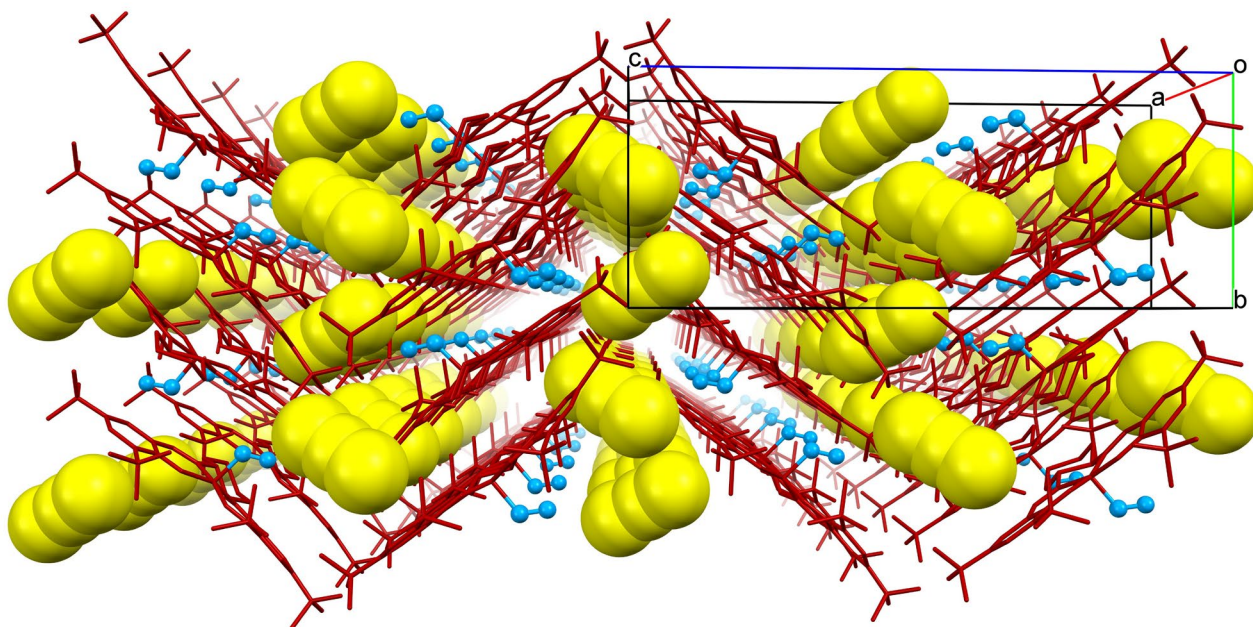

**Figure S4.** Packing diagram for  $\text{Co}(\text{NO})(\text{L}^{R,R})\cdot\text{CS}_2$ , with  $\text{CS}_2$  in yellow and NO in light blue. Hydrogen atoms are omitted for clarity.

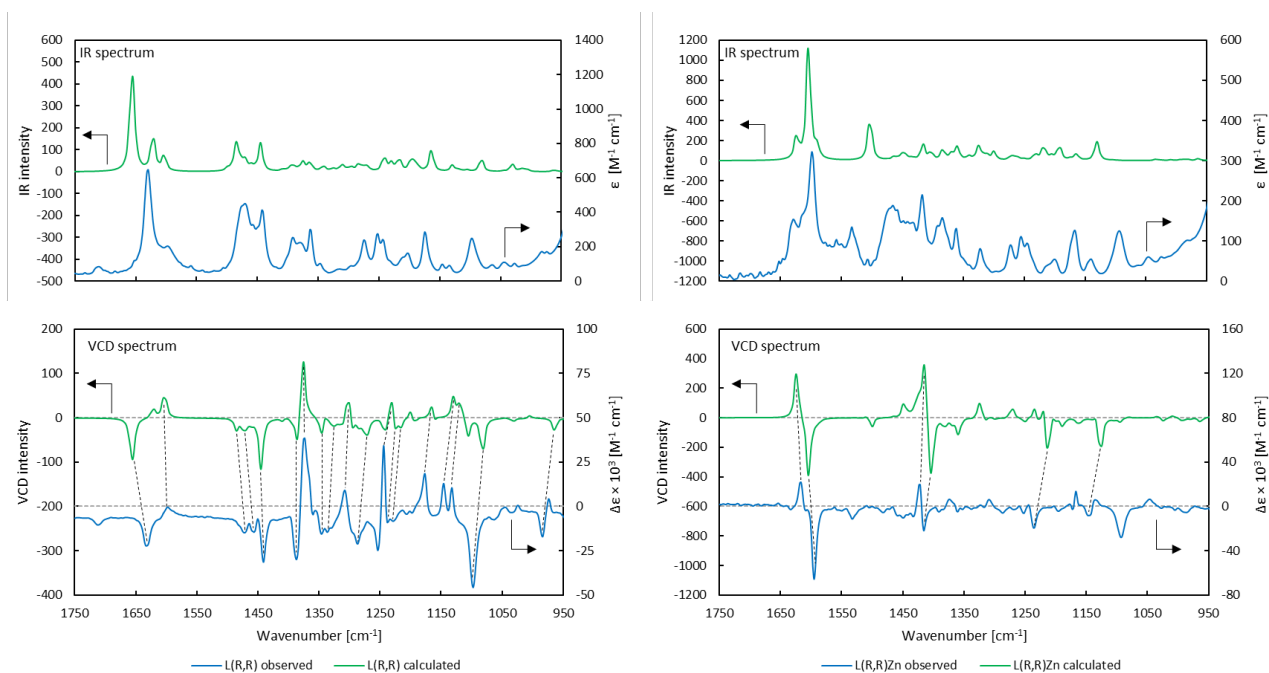

**Figure S5.** Comparison of observed (blue) and calculated (green) IR and VCD spectra of  $\text{L}^{R,R}$  and  $\text{Zn}(\text{L}^{R,R})$ . The calculated spectra are shifted  $-45 \text{ cm}^{-1}$  and  $-70 \text{ cm}^{-1}$  respectively from the originally calculated wavenumbers.

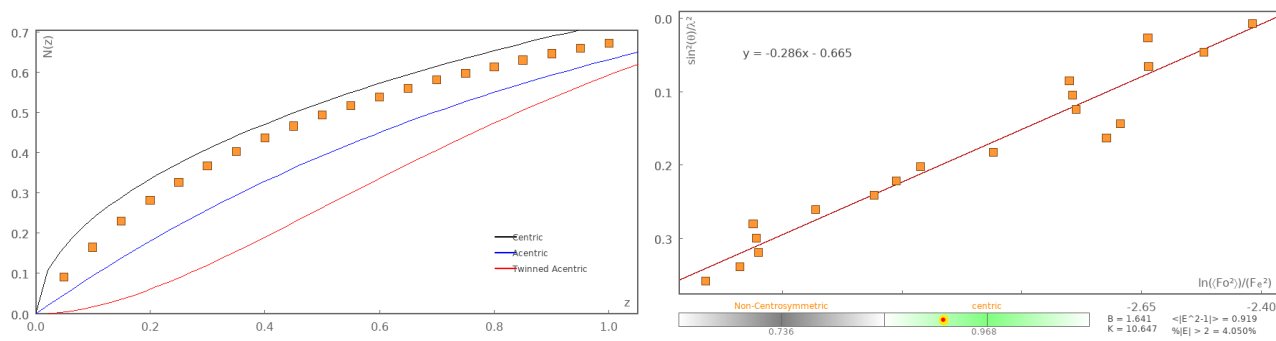

**Figure S6.** Cumulative intensity distribution plot and Wilson plot for  $\text{Co}(\text{L}^{R,R})\cdot\text{CS}_2$

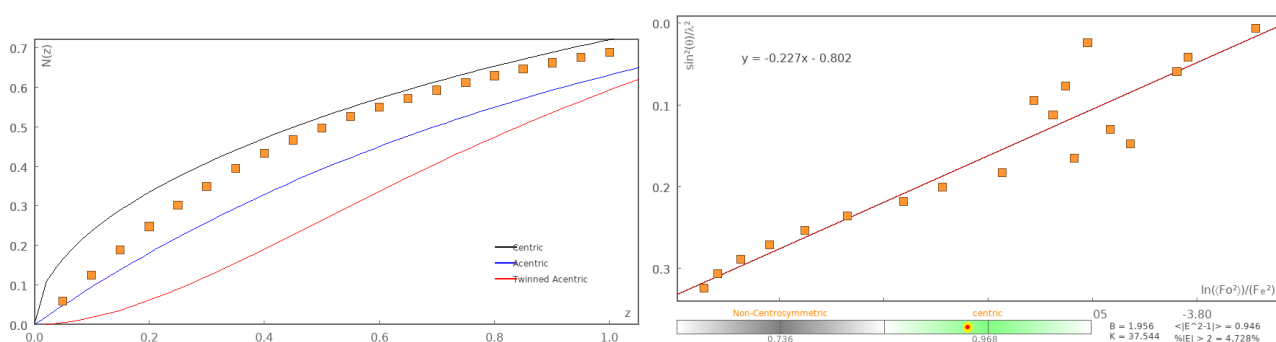

**Figure S7.** Cumulative intensity distribution plot and Wilson plot for  $\text{Co}(\text{L}^{R,R})$

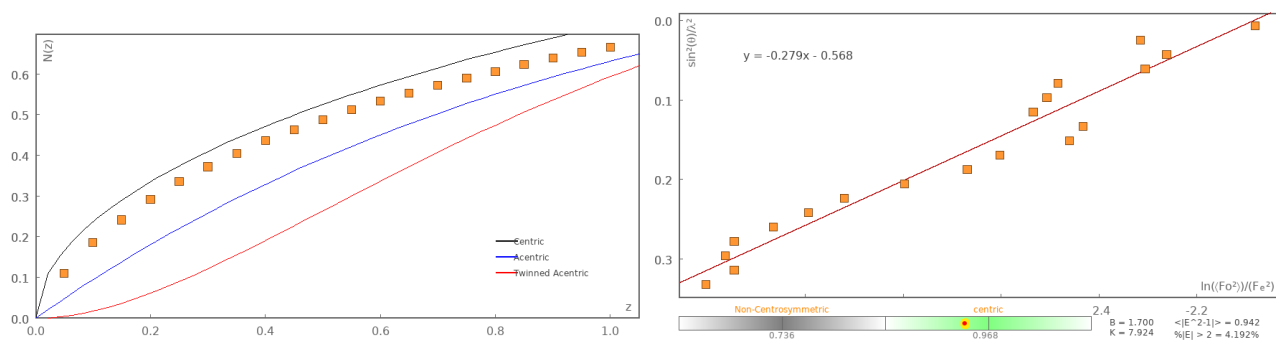

**Figure S8.** Cumulative intensity distribution plot and Wilson plot for  $\text{Co}(\text{NO})(\text{L}^{R,R})\cdot\text{CS}_2$

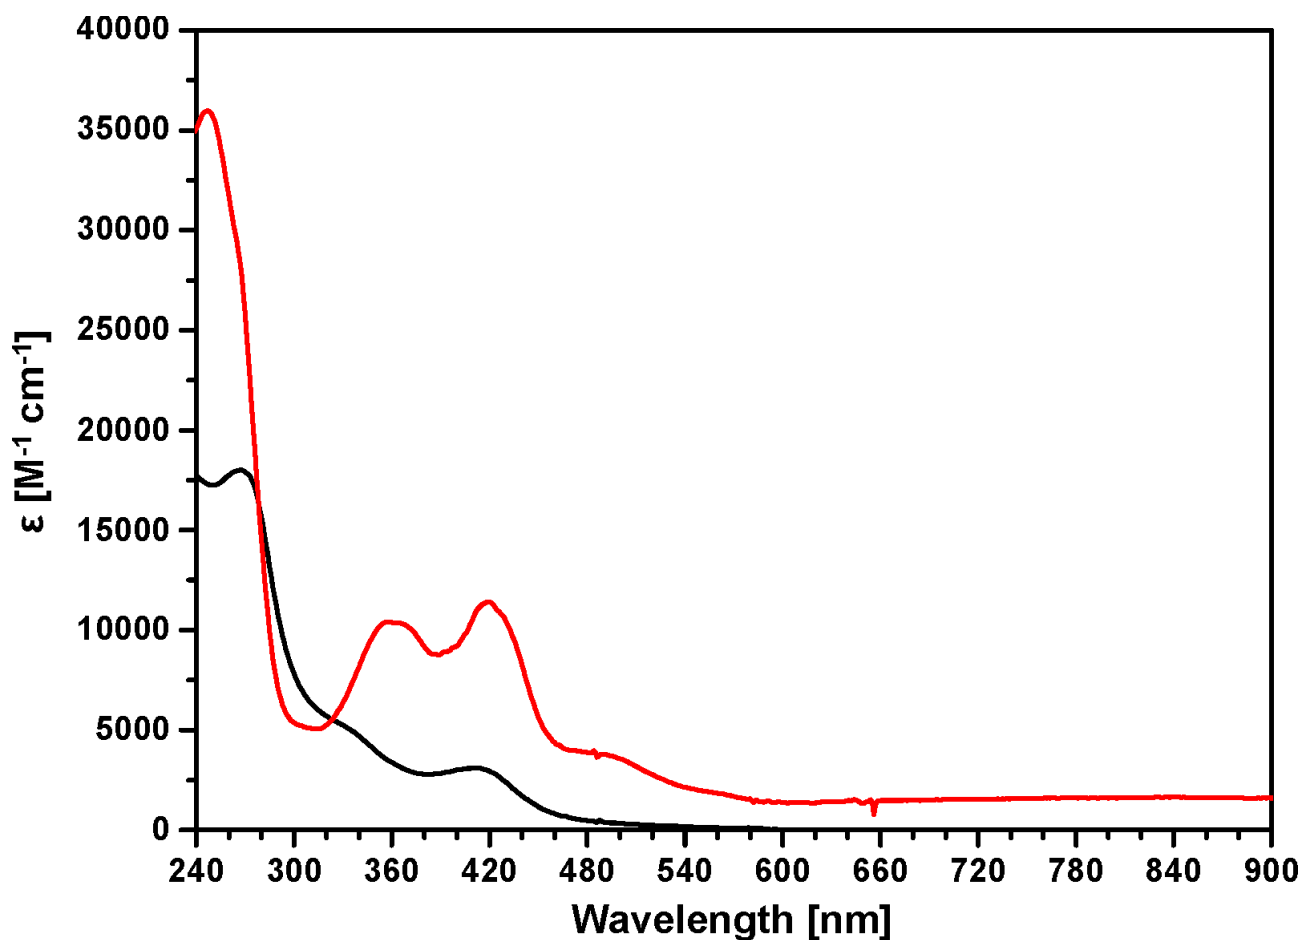

**Figure S9.** UV-vis spectra of  $\text{Co}(\text{L}^{R,R})$  (red) and  $\text{Co}(\text{NO})(\text{L}^{R,R})$  (black) in dichloromethane.

## References

1. Leung, W.-H.; Chan, E. Y. Y.; Chow, E. K. F.; Williams, I. D.; Peng, S.-M. Metal complexes of a chiral quadridentate Schiff base. *J. Chem. Soc., Dalton Trans.* **1996**, 1229.
2. Bobb, R.; Alhakimi, G.; Studniki, L.; Lough, A.; Chin, J. Stereoselective recognition of an aziridine with a Co(III) complex: a potential transition-state analogue for catalytic epoxidation. *J. Am. Chem. Soc.* **2002**, *124*, 4544–4545.
3. Zhang, Y.-L.; Ruan, W.-J.; Zhao, X.-J.; Wang, H.-G.; Zhu, Z.-A. Synthesis and characterization of axial coordination cobalt(III) complexes containing chiral Salen ligands. *Polyhedron* **2003**, *22*, 1535–1545.

4. Chapman, J.; Day, C.; Welker, M. Enantioselective Diels–Alder Reactions of Optically Active (Buta-1,3-dien-2-yl)(salen)cobalt(III) Complexes. *European J. Org. Chem.* **2001**, 2001, 2273–2282.
5. Chapman, J.; Day, C.; Welker, M. Enantioselective Diels–Alder Reactions of Optically Active (Buta-1,3-dien-2-yl)(salen)cobalt(III) Complexes. *European J. Org. Chem.* **2001**, 2001, 2273–2282.
6. Shevick, S. L.; Obradors, C.; Shenvi, R. A. Mechanistic Interrogation of Co/Ni-Dual Catalyzed Hydroarylation. *J. Am. Chem. Soc.* **2018**, 140, 12056–12068.
7. Ready, J. M.; Jacobsen, E. N. Asymmetric Catalytic Synthesis of  $\alpha$ -Aryloxy Alcohols: Kinetic Resolution of Terminal Epoxides via Highly Enantioselective Ring-Opening with Phenols. *J. Am. Chem. Soc.* **1999**, 121, 6086–6087.
8. Cohen, C. T.; Thomas, C. M.; Peretti, K. L.; Lobkovsky, E. B.; Coates, G. W. Copolymerization of cyclohexene oxide and carbon dioxide using (salen)Co(III) complexes: synthesis and characterization of syndiotactic poly(cyclohexene carbonate). *Dalton Trans.* **2006**, 237–249.
9. North, M.; Quek, S. C. Z.; Pridmore, N. E.; Whitwood, A. C.; Wu, X. Aluminum(salen) complexes as catalysts for the kinetic resolution of terminal epoxides via CO<sub>2</sub> coupling. *ACS Catal.* **2015**, 5, 3398–3402.
10. Zhao, Y.; Yu, M.; Zhang, S.; Wu, Z.; Liu, Y.; Peng, C.-H.; Fu, X. A well-defined, versatile photoinitiator (salen)Co-CO<sub>2</sub>CH<sub>3</sub> for visible light-initiated living/controlled radical polymerization. *Chem. Sci.* **2015**, 6, 2979–2988.
11. Chapman, J. J.; Day, C. S.; Welker, M. E. Synthesis and Enantioselective Diels–Alder Reactions of Optically Active Cobalt(III) Salen-1,3-butadien-2-yl Complexes. *Organometallics* **2000**, 19, 1615–1618.
12. Kochem, A.; Kanso, H.; Baptiste, B.; Arora, H.; Philouze, C.; Jarjayes, O.; Vezin, H.; Luneau, D.; Orio, M.; Thomas, F. Ligand contributions to the electronic structures of the oxidized cobalt(II) salen complexes. *Inorg. Chem.* **2012**, 51, 10557–10571.
13. Liu, X.; Tian, L.; Wu, Z.; Zhao, X.; Wang, Z.; Yu, D.; Fu, X. Visible-light-induced synthesis of polymers with versatile end groups mediated by organocobalt complexes. *Polym. Chem.* **2017**, 8, 6033–6038.
14. Herdtweck, E. CCDC 1061414: Experimental Crystal Structure Determination. *CSD Communication* **2015**.
